# Supplementary material
Source: publisher site journal article supplement (https://www.spandidos-publications.com/7684/downloadSupplementary)
Supplement: Supplementary file 1 [file downloadSupplementary]

**Table SI.** Oligonucleotide sequences and probes used for reverse-transcription quantitative PCR.

| <b>Gene name</b> | <b>Oligonucleotide sequence (5'-3')</b> | <b>Probe</b>                | <b>Size, bp</b> |
|------------------|-----------------------------------------|-----------------------------|-----------------|
| OCT4A            | Sense: CGCAAGCCCTCATTTCAC               | CTTCGGATTCGCCTTCTCGCCC      | 111             |
|                  | Antisense: CATCACCTCCACCACCTG           |                             |                 |
| OCT4B            | Sense: CAGGGAATGGGTGAATGAC              | AGTTAGGTGGGCAGCTTGGAAGGCA   | 177             |
|                  | Antisense: AGGCAGAAGACTTGTAAGAAC        |                             |                 |
| OCT4B1           | Sense: GGGTTCTATTTGGTGGGTTCC            | ATTCTGACCGCATCTCCCCTCTAAG   | 128             |
|                  | Antisense: TCCCTCTCCCTACTCCTCTTCA       |                             |                 |
| GAPDH            | Sense: GTGAACCATGAGAAGTATGACAAC         | CCTCAAGATCATCAGCAATGCCTCCTG | 123             |
|                  | Antisense: CATGAGTCCTTCCACGATACC        |                             |                 |

**Table SII.** Oct3/4 isoforms mRNA expression in patients with CD34<sup>+</sup> ALL.

|           |                                          | Mean   | Std. deviation | Std. error of mean | Median | 25-75% percentiles | P-value |
|-----------|------------------------------------------|--------|----------------|--------------------|--------|--------------------|---------|
| CD34      |                                          |        |                |                    |        |                    |         |
| Oct3/4A   | CD34 <sup>-</sup> ALL                    | 17.74  | 26.70          | 5.45               | 2.15   | 0.16-24.71         |         |
|           | CD34 <sup>+</sup> ALL                    | 83.85  | 172.90         | 36.86              | 13.41  | 1.55-83.40         | 0.0368  |
| Oct3/4B   | CD34 <sup>-</sup> ALL                    | 17.36  | 25.05          | 5.11               | 2.39   | 0.25-31.97         |         |
|           | CD34 <sup>+</sup> ALL                    | 42.97  | 69.93          | 14.91              | 9.76   | 1.18-245.80        | 0.0484  |
| Oct3/4B1  | CD34 <sup>-</sup> ALL                    | 36.68  | 63.25          | 12.91              | 1.48   | 0.63-66.60         |         |
|           | CD34 <sup>+</sup> ALL                    | 94.47  | 143.40         | 30.57              | 21.79  | 2.89-122.40        | 0.0389  |
| CD34/CD38 |                                          |        |                |                    |        |                    |         |
| Oct3/4A   | CD34 <sup>+</sup> /CD38 <sup>+</sup> ALL | 15.63  | 34.80          | 11.00              | 2.24   | 0.46-11.73         |         |
|           | CD34 <sup>+</sup> /CD38 <sup>-</sup> ALL | 140.70 | 219.80         | 63.45              | 50.25  | 10.90-166.50       | 0.0112  |
| Oct3/4B   | CD34 <sup>+</sup> /CD38 <sup>+</sup> ALL | 7.33   | 9.87           | 3.12               | 1.88   | 0.64-13.23         |         |
|           | CD34 <sup>+</sup> /CD38 <sup>-</sup> ALL | 72.66  | 84.50          | 24.39              | 48.49  | 4.97-133.40        | 0.0044  |
| Oct3/4B1  | CD34 <sup>+</sup> /CD38 <sup>+</sup> ALL | 21.67  | 42.58          | 13.46              | 3.04   | 0.68-27.20         |         |
|           | CD34 <sup>+</sup> /CD38 <sup>-</sup> ALL | 154.30 | 170.90         | 49.32              | 87.33  | 16.64-337.50       | 0.0071  |

Obtained by Mann Whitney test. 95% CI, confidence interval.
